# Supplementary material for: Combination of Conventional Drugs with Biocompounds Derived from Cinnamic Acid: A Promising Option for Breast Cancer Therapy
Source: MDPI journal article supplement (doi:10.3390/biomedicines11020275), 2023-01-19
Supplement: s1 [file s1]

## Supplementary File(s)

### *Evaluation risk of bias*

The risk of bias was analyzed for the 9 selected publications available in Figure S1. The exclusively in vitro trials or with a part in vitro [37–45] presented between 80–100% of the domains for low risk of bias (scientific background and rationale, objectives and/or hypotheses, the intervention of each group, outcomes, sample size, statistical methods, outcomes and estimation and funding). On the other hand, these publications pointed to a high risk of bias domains (randomization – sequence generation, allocation concealment mechanism, implementation, blinding, limitations and protocol) that have not been reported in 92–100% of in vitro or with a part in vitro studies. No publication selected in the systematic review presented all domains for identifying the risk of bias.

| Studies                    | Checklist item |    |    |   |   |   |   |   |   |   |    |    |    |    |    |
|----------------------------|----------------|----|----|---|---|---|---|---|---|---|----|----|----|----|----|
|                            | 1              | 2a | 2b | 3 | 4 | 5 | 6 | 7 | 8 | 9 | 10 | 11 | 12 | 13 | 14 |
| Suberu et al 2014          | +              | +  | +  | + | + | + | - | - | - | - | -  | -  | -  | +  | -  |
| Motawi et al 2016          | +              | +  | +  | + | + | + | - | - | - | - | +  | +  | -  | +  | -  |
| Motawi et al (1) 2016      | +              | +  | +  | + | + | + | - | - | - | - | +  | -  | -  | +  | -  |
| Fouad et al 2021           | +              | +  | +  | + | + | + | - | - | - | - | +  | +  | -  | +  | -  |
| Zheng et al 2015           | +              | +  | +  | + | + | + | - | - | - | - | +  | +  | -  | +  | -  |
| Choi and Park 2015         | +              | ?  | ?  | + | + | + | - | - | - | - | +  | +  | -  | -  | -  |
| Torki et al 2017           | +              | +  | +  | + | + | + | - | - | - | - | +  | +  | -  | +  | -  |
| Islam et al 2017           | +              | +  | +  | + | + | + | ? | - | - | - | +  | +  | -  | +  | -  |
| Carranza-Torres et al 2015 | +              | +  | ?  | + | + | + | - | - | - | - | +  | +  | -  | +  | -  |

1) Structured abstract; 2a) Scientific background and rationale; 2b) Objectives and/or hypotheses; 3) Intervention of each group; 4) Outcomes; 5) Sample size; 6) Randomization: sequence generation; 7) Allocation concealment mechanism; 8) Implementation; 9) Blinding; 10) Statistical methods; 11) Outcomes and estimation; 12) Limitations; 13) Funding; 14) Protocol. (+) Low risk of bias; (-) High risk of bias; (?) Unclear risk of bias.

**Figure S1.** Risk of bias of the in vitro studies according to the modified CONSORT checklist.

**Table S1.** Databases and search strategy used, and numbers of retrieved studies.

| Database                                     | Search strategy                                                                                                                                                                          | Hits |
|----------------------------------------------|------------------------------------------------------------------------------------------------------------------------------------------------------------------------------------------|------|
| PUBMED searched at December 31, 2022         | #1Breast Neoplasms                                                                                                                                                                       | 17   |
|                                              | #2Cinnamates OR phenolic acid<br>[Supplementary Concept] OR<br>Phenylpropionates                                                                                                         |      |
|                                              | #3Drug Synergism OR Drug Therapy,<br>Combination OR Drug Combinations                                                                                                                    |      |
| WEB OF SCIENCE searched at December 31, 2022 | #1ALL=(Breast cancer)                                                                                                                                                                    | 17   |
|                                              | #2ALL=((Cinnamates) OR (Phenolic acid) OR<br>(Phenylpropionates))                                                                                                                        |      |
|                                              | #3ALL=((Drug Synergism) OR (Drug Therapy,<br>Combination) OR (Drug Combinations))                                                                                                        |      |
| EMBASE searched at December 31, 2022         | #1'breast tumor'                                                                                                                                                                         | 4    |
|                                              | #2'cinnamic acid derivative' OR 'phenolic acid'<br>OR 'phenylpropionic acid derivative'                                                                                                  |      |
|                                              | #3'drug potentiation' OR 'combination drug<br>therapy' OR 'drug combination'                                                                                                             |      |
| SCOPUS searched at December 31, 2022         | (ALL ("Breast Neoplasms") AND ALL<br>("Cinnamates" OR "phenolic acid" OR<br>"Phenylpropionates") AND ALL ("Drug Synergism"<br>OR "Drug Therapy, Combination" OR "Drug<br>Combinations")) | 11   |
| LILACS searched at December 31, 2022         | #1Breast Neoplasms                                                                                                                                                                       | 0    |
|                                              | #2Cinnamates OR phenolic acid OR<br>Phenylpropionates                                                                                                                                    |      |
|                                              | #3Drug Synergism OR Drug Therapy,<br>Combination OR Drug Combinations                                                                                                                    |      |
| COCHRANE searched at December 31, 2022       | #1"Breast Neoplasms"                                                                                                                                                                     | 0    |
|                                              | #2"Cinnamates" OR "phenolic acid" OR<br>"Phenylpropionates"                                                                                                                              |      |
|                                              | #3"Drug Synergism" OR "Drug Therapy,<br>Combination" OR "Drug Combinations"                                                                                                              |      |

**Table S2.** Studies included in the systematic review.

- 
- Carranza-Torres, I.E.; Guzmán-Delgado, N.E.; Coronado-Martínez, C.; Bañuelos-García, J.I.; Viveros-Valdez, E.; Morán-Martínez, J.; Carranza-Rosales, P. Organotypic Culture of Breast Tumor Explants as a Multicellular System for the Screening of Natural Compounds with Antineoplastic Potential. *Biomed Res. Int.* **2015**, *2015*. <https://doi.org/10.1155/2015/618021>.
- Choi, Y.E.; Park, E. Ferulic Acid in Combination with PARP Inhibitor Sensitizes Breast Cancer Cells as Chemotherapeutic Strategy. *Biochem. Biophys. Res. Commun.* **2015**, *458*, 520–524. <https://doi.org/10.1016/j.bbrc.2015.01.147>.
- Fouad, M.A.; Sayed-Ahmed, M.M.; Huwait, E.A.; Hafez, H.F.; Osman, A.M.M. Epigenetic Immunomodulatory Effect of Eugenol and Astaxanthin on Doxorubicin Cytotoxicity in Hormonal Positive Breast Cancer Cells. *BMC Pharmacol. Toxicol.* **2021**, *22*, 1–15. <https://doi.org/10.1186/s40360-021-00473-2>.
- Islam, S.S.; Al-Sharif, I.; Sultan, A.; Al-Mazrou, A.; Remmal, A.; Aboussekhra, A. Eugenol Potentiates Cisplatin Anti-Cancer Activity through Inhibition of ALDH-Positive Breast Cancer Stem Cells and the NF-KB Signaling Pathway. *Mol. Carcinog.* **2018**, *57*, 333–346. <https://doi.org/10.1002/MC.22758>.
- Motawi, T.K.; Abdelazim, S.A.; Darwish, H.A.; Elbaz, E.M.; Shouman, S.A. Modulation of Tamoxifen Cytotoxicity by Caffeic Acid Phenethyl Ester in MCF-7 Breast Cancer Cells. *Oxid. Med. Cell. Longev.* **2016**, *2016*. <https://doi.org/10.1155/2016/3017108>.
- Motawi, T.K.; Abdelazim, S.A.; Darwish, H.A.; Elbaz, E.M.; Shouman, S.A. Could Caffeic Acid Phenethyl Ester Expand the Antitumor Effect of Tamoxifen in Breast Carcinoma? *Nutr. Cancer* **2016**, *68*, 435–445. <https://doi.org/10.1080/01635581.2016.1153669>.
- Suberu, J.O.; Romero-Canelón, I.; Sullivan, N.; Lapkin, A.A.; Barker, G.C. Comparative Cytotoxicity of Artemisinin and Cisplatin and Their Interactions with Chlorogenic Acids in MCF7 Breast Cancer Cells. *ChemMedChem* **2014**, *9*, 2791–2797. <https://doi.org/10.1002/CMDC.201402285>.
- Torki, S.; Soltani, A.; Shirzad, H.; Esmaeil, N.; Ghatrehsamani, M. Synergistic Antitumor Effect of NVP-BEZ235 and CAPE on MDA-MB-231 Breast Cancer Cells. *Biomed. Pharmacother.* **2017**, *92*, 39–45. <https://doi.org/10.1016/j.biopha.2017.05.051>.
- Zheng, X.; Chen, S.; Yang, Q.; Cai, J.; Zhang, W.; You, H.; Xing, J.; Dong, Y. Salvianolic Acid A Reverses the Paclitaxel Resistance and Inhibits the Migration and Invasion Abilities of Human Breast Cancer Cells by Inactivating Transgelin 2. *Cancer Biol. Ther.* **2015**, *16*, 1407. <https://doi.org/10.1080/15384047.2015.1070990>.
-
